# Supplementary material
Source: HighWire-hosted journal article supplement (https://bibliotheek.ehb.be/content/suppl/2022/09/26/10.5.e002931)
Supplement: bmjdrc-2022-002931supp001_data_supplement.pdf [file bmjdrc-2022-002931supp001_data_supplement.pdf]

Supplemental Figure 1. Associations between adiposity, type 2 diabetes mellitus (T2DM) risk, and 25 hydroxyvitamin D

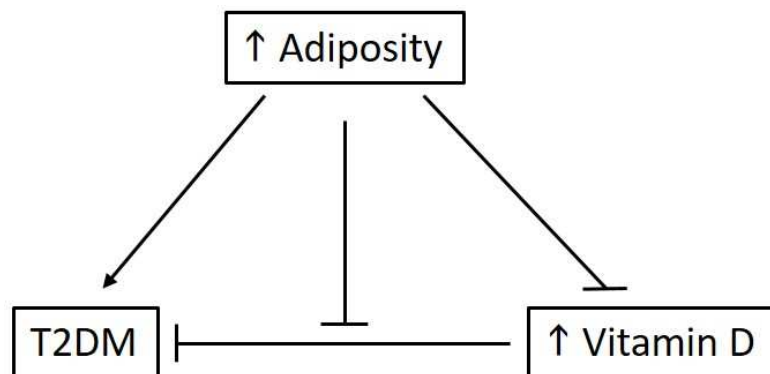

Figure Legend: arrows indicate positive associations, while T-shaped connectors indicate inverse associations or attenuation of an association. These are not causal connections.
