# Supplementary material
Source: HighWire-hosted journal article supplement (https://bibliotheek.ehb.be/content/suppl/2022/09/26/10.5.e002931)
Supplement: bmjdrc-2022-002931supp003_data_supplement.pdf [file bmjdrc-2022-002931supp003_data_supplement.pdf]

Supplemental Figure 2. The interaction between 25 hydroxyvitamin D or Parathyroid Hormone and BMI as evidenced by different slopes (XBETA) in the hazard model describing incident diabetes.

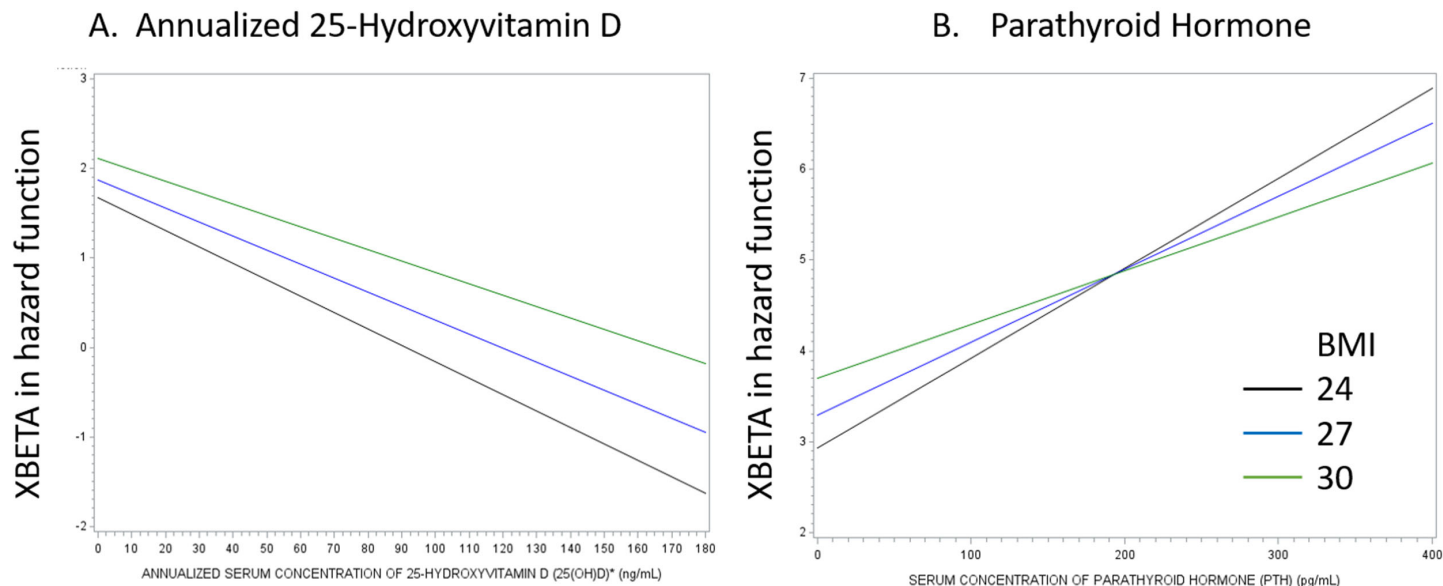

BMI: body mass index ( $\text{kg}/\text{m}^2$ )

The three lines represent the slope of 25 hydroxyvitamin D (x-axis) predicting (XBETA) in the hazard model (y-axis) such that one line was plotted for the cut point of the first quartile of BMI ( $24 \text{ kg}/\text{m}^2$ ), a second line for the cut point of the second quartile of BMI ( $27 \text{ kg}/\text{m}^2$ ), and a third line for the cut point of the third quartile of BMI ( $30 \text{ kg}/\text{m}^2$ ).
